# Supplementary material for: Indoor–Outdoor Oxidative Potential of PM2.5 in Wintertime Fairbanks, Alaska: Impact of Air Infiltration and Indoor Activities
Source: PubMed Central journal article supplement (PMC10928657; doi:10.1021/acsestair.3c00067), 2024-02-14
Supplement: ea3c00067_si_001.pdf [file ea3c00067_si_001.pdf]

1 Indoor - Outdoor Oxidative Potential of PM<sub>2.5</sub> in  
2 Wintertime Fairbanks, Alaska: Impact of Air  
3 Infiltration and Indoor Activities

4 *Yuhan Yang<sup>1</sup>, Michael A. Battaglia<sup>1, a</sup>, Ellis S. Robinson<sup>2</sup>, Peter F. DeCarlo<sup>2</sup>, Kasey C.*  
5 *Edwards<sup>3</sup>, Ting Fang<sup>3, b</sup>, Sukriti Kapur<sup>3</sup>, Manabu Shiraiwa<sup>3</sup>, Meeta Cesler-Maloney<sup>4</sup>, William R.*  
6 *Simpson<sup>4</sup>, James R. Campbell<sup>4</sup>, Athanasios Nenes<sup>1, 5, 6</sup>, Jingqiu Mao<sup>4</sup>, Rodney J. Weber<sup>1, \*</sup>*

7  
8 <sup>1</sup> School of Earth and Atmospheric Sciences, Georgia Institute of Technology, Atlanta, Georgia  
9 30332, USA

10 <sup>2</sup> Department of Environmental Health & Engineering, Johns Hopkins University, Baltimore,  
11 Maryland, 21218 USA

12 <sup>3</sup> Department of Chemistry, University of California, Irvine, California, 92697 USA.

13 <sup>4</sup> Geophysical Institute and Department of Chemistry & Biochemistry, University of Alaska  
14 Fairbanks, Fairbanks, Alaska, 99775 USA

15 <sup>5</sup> Laboratory of Atmospheric Processes and their Impacts (LAPI), School of Architecture, Civil  
16 & Environmental Engineering, Ecole Polytechnique Fédérale de Lausanne, Lausanne, 1015  
17 Switzerland.

18 <sup>6</sup> Center for Studies of Air Quality and Climate Change, Institute of Chemical Engineering  
19 Sciences, Foundation for Research and Technology Hellas, Patras, 26504 Greece.

20 <sup>a</sup> Now at: U.S. Army DEVCOM CBC, Aberdeen Proving Ground, Maryland, 21010 USA

21 <sup>b</sup> Now at: Sustainable Energy and Environment Thrust, The Hong Kong University of Science  
22 and Technology (Guangzhou), Guangzhou, 511400 China

23 **Table S1.** Detailed description of the indoor experiments.

| Date       | Start time  | Stop time   | period           | Emission type        |
|------------|-------------|-------------|------------------|----------------------|
| 2022-01-25 | 2:15:00 PM  | 5:15:00 PM  | Active Emissions | Pellet Stove         |
| 2022-01-25 | 5:15:00 PM  | 8:15:00 PM  | ConcDecay        | Pellet Stove         |
| 2022-01-28 | 4:12:00 PM  | 7:20:00 PM  | Active Emissions | Pellet Stove         |
| 2022-01-28 | 7:20:00 PM  | 9:20:00 PM  | ConcDecay        | Pellet Stove         |
| 2022-01-29 | 12:03:00 PM | 1:00:00 PM  | Active Emissions | Cooking <sup>1</sup> |
| 2022-01-29 | 1:00:00 PM  | 2:00:00 PM  | ConcDecay        | Cooking              |
| 2022-01-29 | 3:00:00 PM  | 3:14:00 PM  | Active Emissions | Cooking <sup>2</sup> |
| 2022-01-29 | 3:14:00 PM  | 6:14:00 PM  | ConcDecay        | Cooking              |
| 2022-01-30 | 1:15:00 PM  | 1:35:00 PM  | Active Emissions | Cooking <sup>3</sup> |
| 2022-01-30 | 1:35:00 PM  | 3:00:00 PM  | ConcDecay        | Cooking              |
| 2022-01-30 | 3:00:00 PM  | 4:15:00 PM  | Active Emissions | Cooking <sup>3</sup> |
| 2022-01-30 | 4:15:00 PM  | 6:15:00 PM  | ConcDecay        | Cooking              |
| 2022-01-31 | 3:15:00 PM  | 6:15:00 PM  | Active Emissions | Pellet Stove         |
| 2022-01-31 | 6:15:00 PM  | 9:15:00 PM  | ConcDecay        | Pellet Stove         |
| 2022-02-03 | 2:55:00 PM  | 5:20:00 PM  | Active Emissions | Pellet Stove         |
| 2022-02-03 | 5:20:00 PM  | 8:20:00 PM  | ConcDecay        | Pellet Stove         |
| 2022-02-05 | 12:12:00 PM | 3:12:00 PM  | Active Emissions | Pellet Stove         |
| 2022-02-05 | 3:12:00 PM  | 6:12:00 PM  | ConcDecay        | Pellet Stove         |
| 2022-02-07 | 10:15:00 AM | 1:15:00 PM  | Active Emissions | Mixed                |
| 2022-02-07 | 1:15:00 PM  | 6:30:00 PM  | ConcDecay        | Mixed                |
| 2022-02-08 | 9:15:00 AM  | 12:01:00 PM | Active Emissions | Mixed                |
| 2022-02-08 | 12:01:00 PM | 4:01:00 PM  | ConcDecay        | Mixed                |
| 2022-02-09 | 10:15:00 AM | 1:01:00 PM  | Active Emissions | Mixed                |
| 2022-02-09 | 1:01:00 PM  | 5:01:00 PM  | ConcDecay        | Mixed                |
| 2022-02-10 | 11:30:00 AM | 2:14:00 PM  | Active Emissions | Mixed                |
| 2022-02-10 | 2:14:00 PM  | 6:14:00 PM  | ConcDecay        | Mixed                |
| 2022-02-11 | 10:30:00 AM | 1:38:00 PM  | Active Emissions | Pellet Stove         |
| 2022-02-11 | 1:38:00 PM  | 5:38:00 PM  | ConcDecay        | Pellet Stove         |
| 2022-02-16 | 3:00:00 PM  | 6:07:00 PM  | Active Emissions | Mixed                |
| 2022-02-16 | 6:07:00 PM  | 10:07:00 PM | ConcDecay        | Mixed                |
| 2022-02-18 | 1:00:00 PM  | 3:09:00 PM  | Active Emissions | Mixed                |
| 2022-02-18 | 3:09:00 PM  | 6:30:00 PM  | ConcDecay        | Mixed                |
| 2022-02-18 | 8:30:00 PM  | 8:50:00 PM  | Active Emissions | Incense              |
| 2022-02-18 | 8:50:00 PM  | 11:50:00 PM | ConcDecay        | Incense              |
| 2022-02-21 | 1:30:00 PM  | 4:40:00 PM  | Active Emissions | Pellet Stove         |
| 2022-02-21 | 4:40:00 PM  | 7:45:00 PM  | ConcDecay        | Pellet Stove         |
| 2022-02-21 | 7:45:00 PM  | 8:30:00 PM  | Active Emissions | Incense              |

|            |             |             |                  |                      |
|------------|-------------|-------------|------------------|----------------------|
| 2022-02-21 | 8:30:00 PM  | 11:30:00 PM | ConcDecay        | Incense              |
| 2022-02-22 | 10:00:00 AM | 1:12:00 PM  | Active Emissions | Pellet Stove         |
| 2022-02-22 | 1:12:00 PM  | 4:12:00 PM  | ConcDecay        | Pellet Stove         |
| 2022-02-23 | 11:30:00 AM | 12:20:00 PM | Active Emissions | Incense              |
| 2022-02-23 | 12:20:00 PM | 1:30:00 PM  | ConcDecay        | Incense              |
| 2022-02-23 | 1:30:00 PM  | 4:44:00 PM  | Active Emissions | Pellet Stove         |
| 2022-02-23 | 4:44:00 PM  | 7:45:00 PM  | ConcDecay        | Pellet Stove         |
| 2022-02-23 | 8:00:00 PM  | 8:30:00 PM  | Active Emissions | Car (Outdoor Source) |
| 2022-02-24 | 10:30:00 AM | 11:20:00 AM | Active Emissions | Incense              |
| 2022-02-24 | 11:20:00 AM | 2:20:00 PM  | ConcDecay        | Incense              |

24 <sup>1</sup> Pasta boil and sauce simmer.

25 <sup>2</sup> Oil aerosol generation: add ¼ cup of vegetable oil to the sauté pan and add water to the hot oil.

26 <sup>3</sup> Both Pasta boil and oil aerosol generation.

27

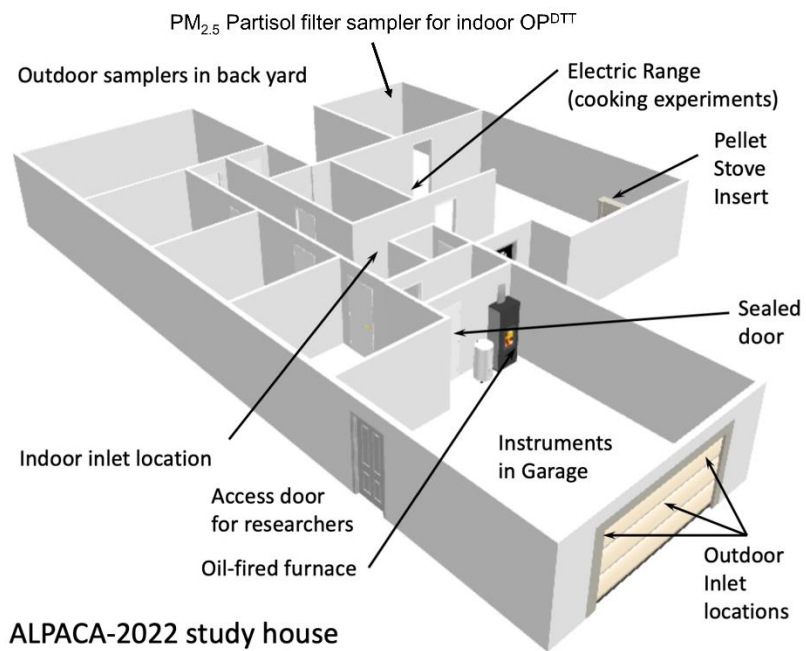

28

29 **Figure S1.** A 3-D rendering of the one-story house's plan showing locations of inlets and key

30 indoor sources and inlet locations. The house was in a suburban area of Fairbanks, Alaska.

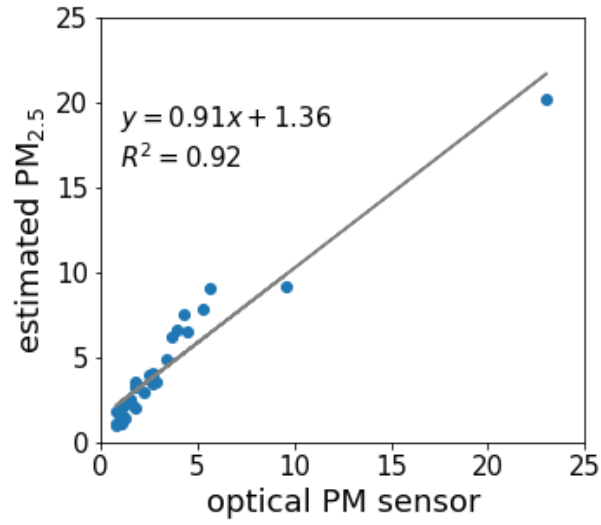

31  
32 **Figure S2.** Comparison between indoor  $PM_{2.5}$  mass concentration estimated by  $PM_{1+BC}$  and  
33  $PM_{2.5}$  measurement using a low-cost optical PM sensor merged to the filter sampling time,  
34 Orthogonal regression was applied.

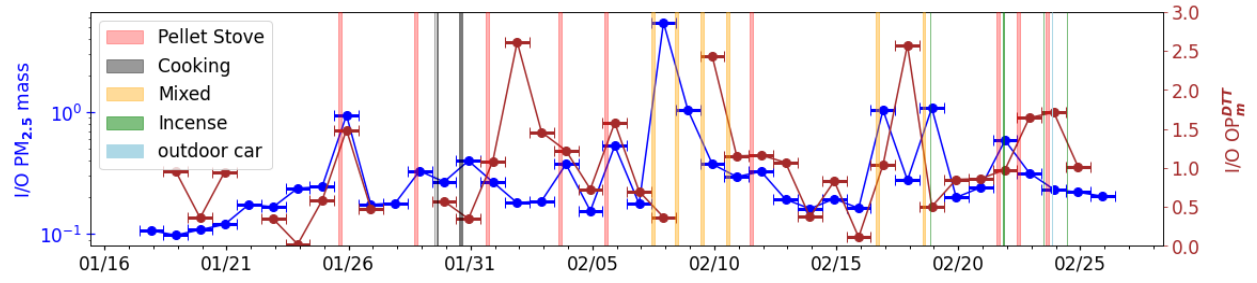

35

36 **Figure S3.** Time series of indoor-outdoor (I/O) PM<sub>2.5</sub> mass, I/O OP<sub>m</sub><sup>DTT</sup> and the time slot of

37 different experiments.

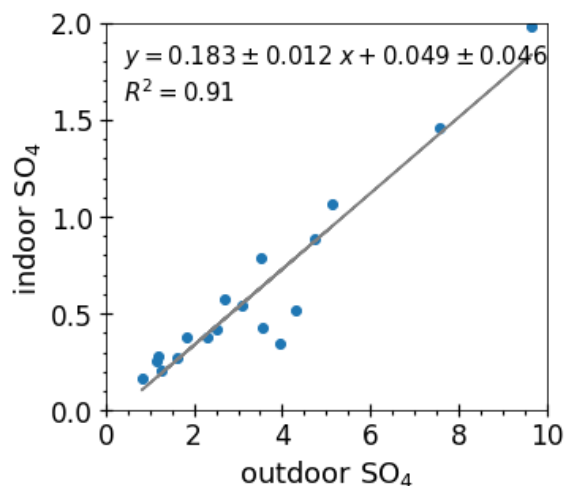

38  
39 **Figure S4.** Daily average PM<sub>1</sub> sulfate concentrations measured indoors and outdoors with an  
40 Aerosol Mass Spectrometer (AMS) merged to the filter sampling time, during periods of no indoor  
41 activities (Background and No-experiments). Orthogonal regression was applied. Background  
42 refers to the period at the start of the study prior to any indoor perturbation experiments. No  
43 experiments are days during the study when there was no perturbation experiment, but experiments  
44 had occurred on previous days.
